# Supplementary material
Source: Springer Nature journal article supplement (https://www.springermedizin.de/resource/supplementary/12978_2006_20_MOESM1_ESM.pdf/9602678)
Supplement: MOESM1 [file 9602678]

1594 women reported during the 4-monthly surveillance to have delivered (September-November 2002, Asembo-Gem)

730 women randomly selected

635 women participated

Not participating: 95  
Reasons:  
Not eligible: 8  
Unavailable for interview: 82  
Died since delivery: 3  
Other: 2
